# Supplementary material for: Identifying missing sources and reducing NO x emissions uncertainty over China using daily satellite data and a mass-conserving method
Source: Copernicus journal article supplement (doi:10.5194/acp-25-2291-2025), 2025-02-21

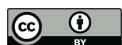

*Supplement of*

## **Identifying missing sources and reducing $\text{NO}_x$ emissions uncertainty over China using daily satellite data and a mass-conserving method**

**Lingxiao Lu et al.**

*Correspondence to:* Jason Blake Cohen ([jasonbc@alum.mit.edu](mailto:jasonbc@alum.mit.edu), [jasonbc@cumt.edu.cn](mailto:jasonbc@cumt.edu.cn))

The copyright of individual parts of the supplement might differ from the article licence.

**Table S1: The 20<sup>th</sup>, 50<sup>th</sup>,80<sup>th</sup> percentile ranges of three coefficients from INTAC<sub>0%</sub> and INTAC<sub>30%</sub>.**

| <b>NO<sub>x</sub>/NO<sub>2</sub></b> | <b>INTAC<sub>0%</sub></b> | <b>INTAC<sub>30%</sub></b> |
|--------------------------------------|---------------------------|----------------------------|
| 20%                                  | 2.76                      | 2.68                       |
| 50%                                  | 6.30                      | 6.24                       |
| 80%                                  | 14.6                      | 14.9                       |
| <b>Lifetime (days)</b>               | <b>INTAC<sub>0%</sub></b> | <b>INTAC<sub>30%</sub></b> |
| 20%                                  | 0.29                      | 0.27                       |
| 50%                                  | 0.48                      | 0.48                       |
| 80%                                  | 0.68                      | 0.73                       |
| <b>Transport (km)</b>                | <b>INTAC<sub>0%</sub></b> | <b>INTAC<sub>30%</sub></b> |
| 20%                                  | -322.                     | -289.0                     |
| 50%                                  | 18.1                      | 16.3                       |
| 80%                                  | 351.                      | 314.                       |

**Table S2: The account of grids from different sources over which the median values of NO<sub>x</sub>/NO<sub>2</sub> are from 1 to 5, from 5 to 10 and above 10.**

| <b>Different sources (Number)</b> | <b>From 1 to 5</b> | <b>From 5 to 10</b> | <b>Above 10</b> |
|-----------------------------------|--------------------|---------------------|-----------------|
| Biomass Burning (30)              | 22%                | 48%                 | 30%             |
| Cement Factories (99)             | 29%                | 36%                 | 35%             |
| Heat Production and Supply (195)  | 34%                | 42%                 | 24%             |
| Steel and Iron Factories (85)     | 24%                | 24%                 | 52%             |
| Power Plants (104)                | 20%                | 40%                 | 40%             |

**Table S3: The 25<sup>th</sup> percentile, mean, and 75<sup>th</sup> percentile values of day-by-day and grid-by-grid emissions (T/day) for 30 cities.**

| <b>Region 1</b> | <b>Cities</b> | <b>Mean</b> | <b>25th</b> | <b>75th</b> |
|-----------------|---------------|-------------|-------------|-------------|
| 1               | Beijing       | 3.35        | 1.65        | 4.27        |
| 2               | Tianjin       | 4.70        | 2.64        | 5.70        |
| 3               | Tangshan      | 5.01        | 2.63        | 6.02        |
| 4               | Jinan         | 3.75        | 2.36        | 4.38        |
| 5               | Zibo          | 3.81        | 2.26        | 4.55        |
| 6               | Jining        | 3.29        | 2.28        | 3.90        |
| 7               | Heze          | 2.90        | 2.04        | 3.51        |
| 8               | Qingdao       | 2.79        | 1.74        | 3.44        |
| 9               | Xuzhou        | 2.86        | 2.04        | 3.45        |
| 10              | Shijiazhuang  | 3.76        | 2.28        | 4.64        |
| 11              | Xingtai       | 3.55        | 2.39        | 4.26        |
| 12              | Handan        | 3.76        | 2.39        | 4.38        |
| 13              | Lianyungang   | 2.86        | 2.04        | 3.44        |
| <b>Region 2</b> | <b>Cities</b> | <b>Mean</b> | <b>25th</b> | <b>75th</b> |
| 14              | Shanghai      | 4.62        | 2.13        | 5.81        |
| 15              | Suzhou        | 3.28        | 1.82        | 4.07        |
| 16              | Wuxi          | 2.67        | 1.66        | 3.25        |
| 17              | Changzhou     | 3.08        | 1.97        | 3.55        |
| 18              | Nanjing       | 3.08        | 1.65        | 3.27        |
| 19              | Ma'anshan     | 2.56        | 1.66        | 2.88        |
| 20              | Wuhan         | 2.66        | 1.31        | 2.62        |
| 21              | Hangzhou      | 1.74        | 0.89        | 2.07        |
| 22              | Ningbo        | 2.03        | 1.16        | 2.27        |
| <b>Region 3</b> | <b>Cities</b> | <b>Mean</b> | <b>25th</b> | <b>75th</b> |
| 23              | Xiamen        | 2.73        | 1.50        | 3.40        |
| 24              | Shantou       | 2.14        | 1.57        | 2.34        |
| 25              | Dongguan      | 4.15        | 2.61        | 4.66        |
| 26              | Foshan        | 4.11        | 1.98        | 4.74        |
| 27              | Hongkong      | 4.38        | 2.17        | 5.07        |
| 28              | Macao         | 2.98        | 1.78        | 4.14        |
| 29              | Guangzhou     | 3.30        | 1.65        | 3.75        |
| 30              | Beihai        | 1.46        | 1.07        | 1.58        |

**Figure S1: The distributions of three key coefficients obtained from INTAC<sub>0%</sub> and INTAC<sub>30%</sub>: a) NO<sub>x</sub>/NO<sub>2</sub>, b) Lifetime [hours], c) Transport [km]. The ratio of (INTAC<sub>30%</sub>-INTAC<sub>0%</sub>)/INTAC<sub>0%</sub> is also displayed on: d) NO<sub>x</sub>/NO<sub>2</sub>, e) Lifetime [hours], f) Transport [km].**

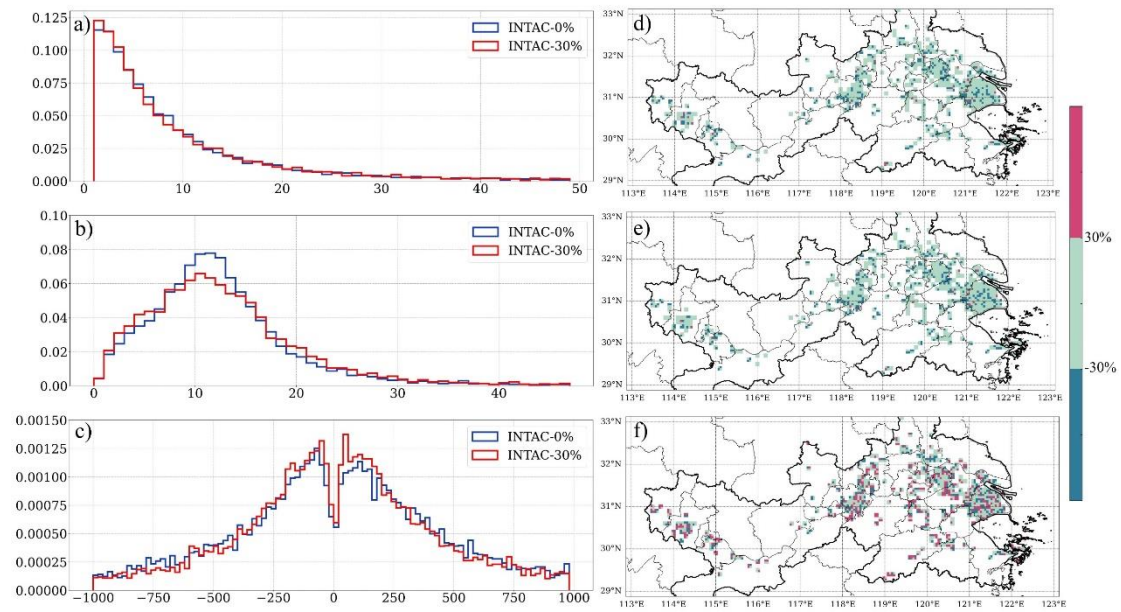

**Figure S2: Map of median values in 12 months overlaid by the different types of sources: a) Biomass Burning, b) Cement Factories, c) Heat Production and Supply, d) Steel and Iron Factories, e) Power Plants.**

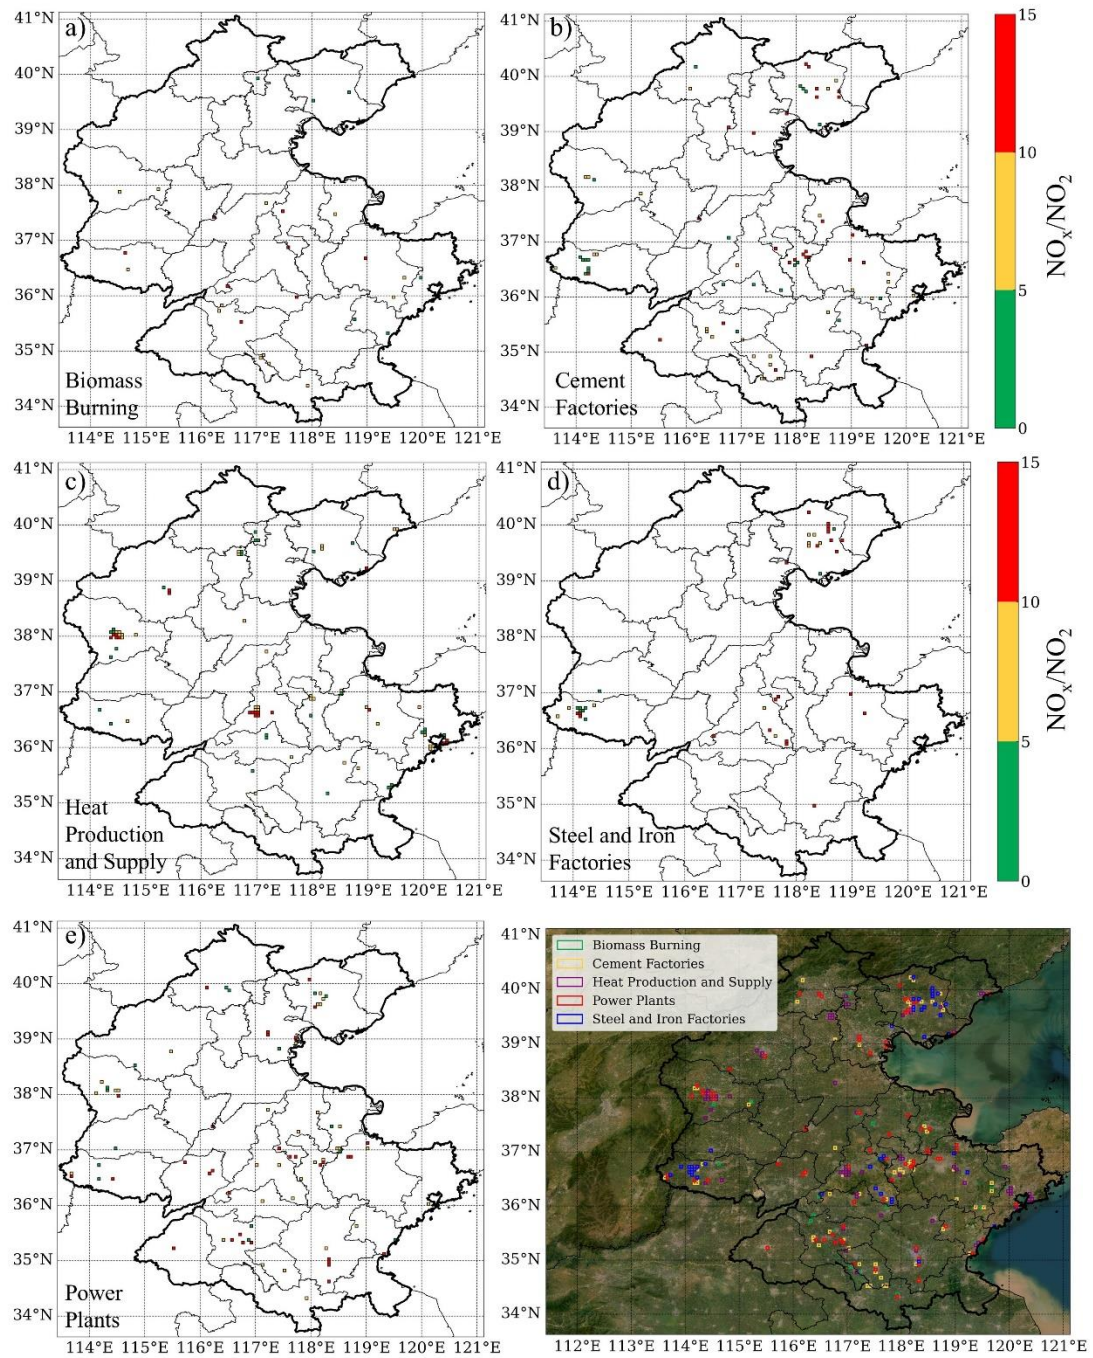

Figure S3: The TROPOMI NO<sub>2</sub> column data is perturbed by a random factor 40% herein called [TO<sub>40%</sub>] to represent its range of uncertainty. The results are displayed for annual mean of emissions of a) TO<sub>0%</sub>, b) TO<sub>40%</sub>, and annual mean of error of c) TO<sub>0%</sub>, d) TO<sub>40%</sub>, and the annual mean of e) (TO<sub>0%</sub>-TO<sub>40%</sub>)/TO<sub>0%</sub>.

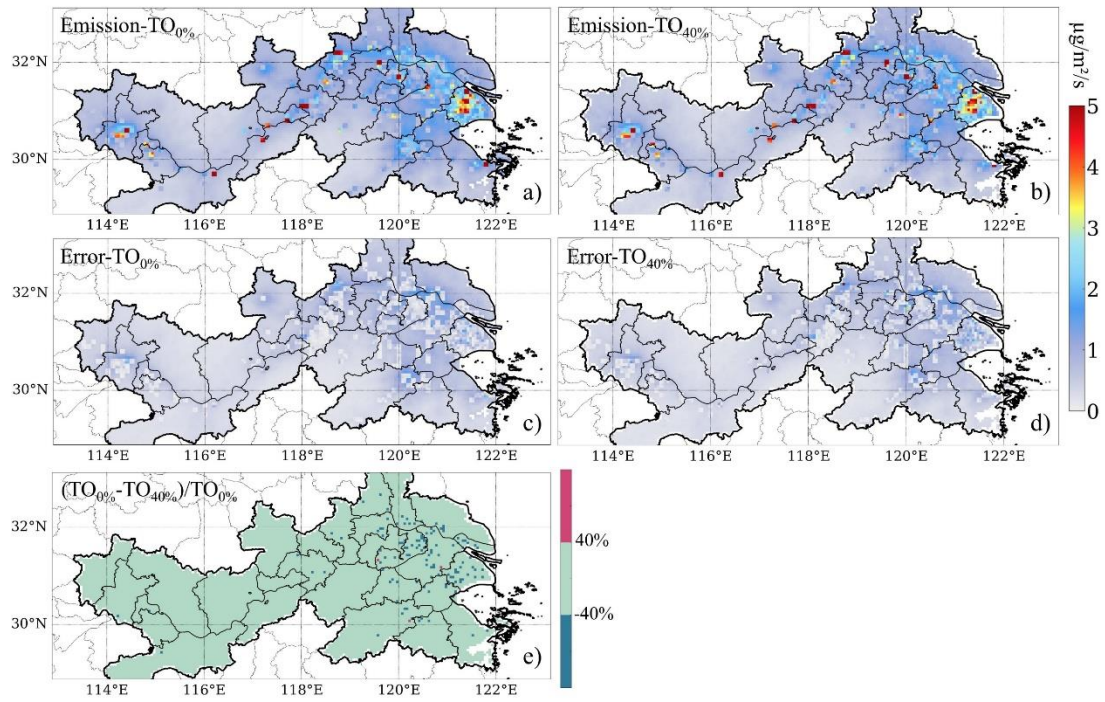

Figure S4: a) The PDF of NO<sub>x</sub> emissions [ $\mu\text{g}/\text{m}^2/\text{s}$ ] over all individual days and grids of TO<sub>0%</sub> and TO<sub>40%</sub>, b) The 20<sup>th</sup>, mean and 80<sup>th</sup> values across different months of TO<sub>0%</sub> and TO<sub>40%</sub>, and c) The time series of the spatial median values of TO<sub>0%</sub> and TO<sub>40%</sub> for whole year.

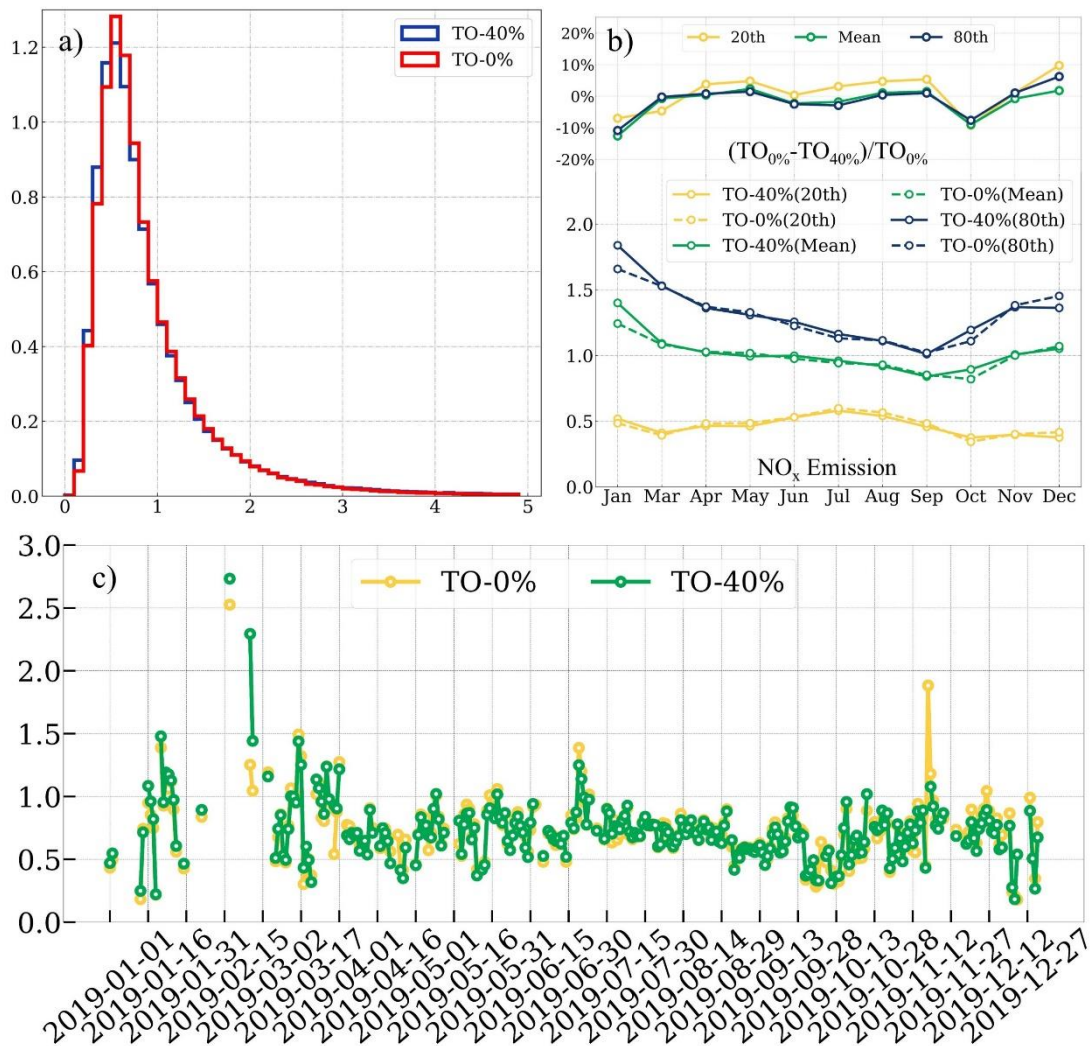

Supplement: Supplementary file 1 [file acp-25-2291-2025-supplement.pdf]
